# Supplementary material for: Interplay of dFOXO and Two ETS-Family Transcription Factors Determines Lifespan in Drosophila melanogaster
Source: PubMed Central journal article supplement (PMC4169242; doi:10.1371/journal.pgen.1004619), 2014-09-18
Supplement: pgen.1004619.s008.pdf [file pgen.1004619.s008.pdf]

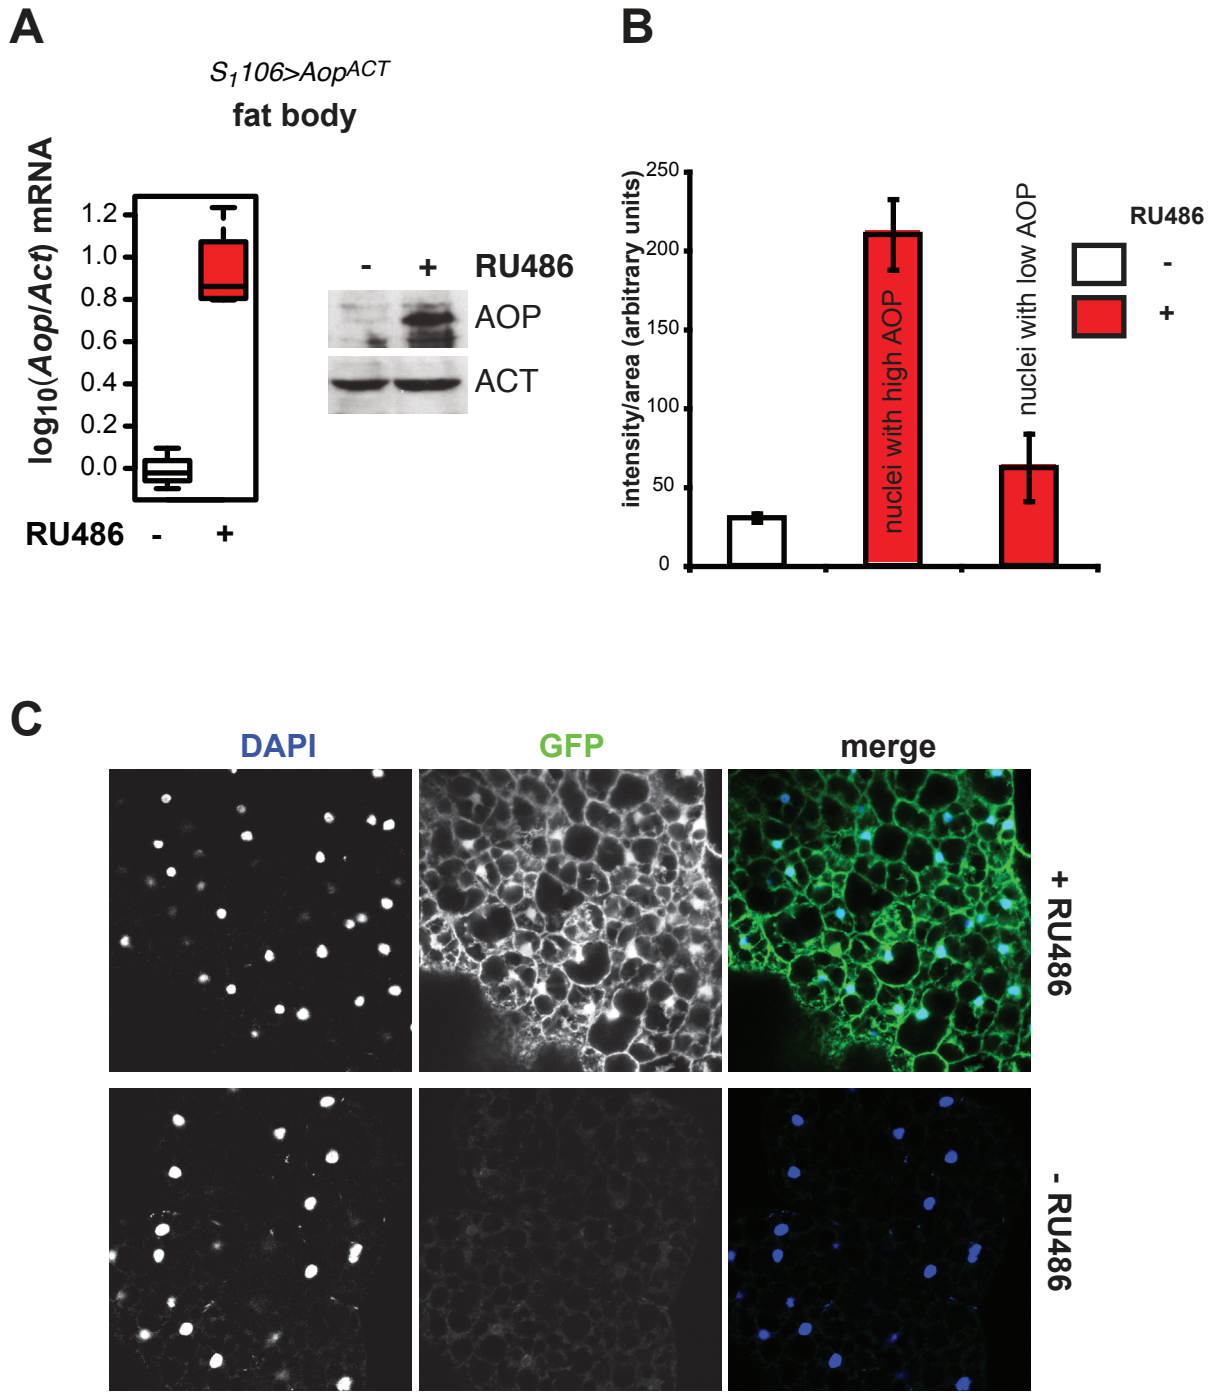

Figure S8
