# Supplementary material for: Interplay of dFOXO and Two ETS-Family Transcription Factors Determines Lifespan in Drosophila melanogaster
Source: PubMed Central journal article supplement (PMC4169242; doi:10.1371/journal.pgen.1004619), 2014-09-18
Supplement: pgen.1004619.s011.pdf [file pgen.1004619.s011.pdf]

# Protocol S1

## Primer Sequences

### Primers for ChIP analysis:

#### *InR P3*

forward: GCGATGATCGCTGGAAGGTT

reverse: GCGTTTGTCAATTCCGAGGAT

#### *Aop 3'*

forward: CTTTCTTTGCGGCTGTCAAAC

reverse: TGTTGGTTTATGCAGATGTG

#### *Aop 5'*

forward: CTCGGTGTGTGTTTACATTG

reverse: TGCTCTCGCTGATGTTGCTG

#### *U6*

forward: GACTCAGTTCGTATATATAG

reverse: GGGCGCCAGTGCTCACTACT

### Primers used for cDNA analysis:

#### *Aop*

forward: ACGAGGACTGTTATCCACTC

reverse: CTGCCTGCTGGTCATCGTG

#### *Obp99b*

forward: GTTGAGGTGCACGAATCGGAC

reverse: AGGCCTTCGTGCAGGAGTCGC

#### *lipA*

forward: CGTTAATGCCAATGCGAGC

reverse: GGATGCCCTGGTTGCTAG

#### *CG6295*

forward: GTCCATCCACTCCATGGTAC

reverse: TTGTGTCCTGGCGGCTAATG

#### *dfoxo* intronic

forward: CCACCATGCTCGCTGGTCTC

reverse: CTCCATTTGACTGACTGACTTG

*Actin5C*:

forward: CACACCAAATCTTACAAAATGTGTGA

reverse: AATCCGGCCTTGACATG

Primers used for *Aop*<sup>ACT</sup> cloning:

forward: CACCATGTCCAAAATGAAAATGCTCCCAG

reverse: CTACTGCTGCATGTGTGCGGAAG
